# Supplementary material for: Short-term functional outcome in psychotic patients: results of the Turku early psychosis study (TEPS)
Source: BMC Psychiatry. 2021 Dec 2;21:602. doi: 10.1186/s12888-021-03516-4 (PMC8641211; doi:10.1186/s12888-021-03516-4)
Supplement: Supplementary file 3 — Additional file 3: Supplementary Table 2. Repeated bivariate ANOVA of functional outcomes for baseline symptoms (SIPS), childhood adverse and trauma experiences (TADS). [file 12888_2021_3516_MOESM3_ESM.xlsx]

## Sheet: Sheet1
Supplementary Table 2. Repeated bivariate ANOVA of functional outcomes for baseline symptoms (SIPS), childhood adverse and trauma experiences (TADS)
and premorbid adjustment (PAS) by diagnostic groups. Significant associations bolded.
Total sample*	ALL (n=237)					FEP† (n=125)					CHR-P‡ (n=60)					CHR-N§ (n=47)
	B	t	p	CI95%		B	t	p	CI95%		B	t	p	CI95%		B	t	p	CI95%
Symptoms (SIPS)	ALL (n=232)					FEP† (n=130)					CHR-P‡ (n=60)					CHR-N§ (n=47)
SIPSsum			<0,001					<0,001					0.005					<0,001
GAFT0	-0.644387	-5.02345	1.02437e-06	-0.897145	-0.39163	-0.357178	-4.7052	<0,001	-0.507491	-0.206866	-0.354986	-3.99075	<0,001	-0.533178	-0.176793	-0.383028	-3.89431	<0,001	-0.581127	-0.184929
GAFT1	-0.483585	-2.75244	0.0063915	-0.829776	-0.137395	-0.49758	-5.1984	<0,001	-0.687111	-0.308049	-0.469867	-3.38566	0.00130372	-0.74788	-0.191854	-0.63618	-3.5369	0.000952028	-0.998456	-0.273904
GAFT2	-0.396106	-2.07344	0.0392545	-0.772531	-0.0196806	-0.442755	-4.21791	<0,001	-0.650606	-0.234904	-0.109542	-0.632635	0.529547	-0.456407	0.237323	-0.741741	-3.92868	<0,001	-1.12201	-0.361476
SIPS_P			<0,001					0.017					0.828					0.044
GAFT0	-0.644387	-5.02345	<0,001	-0.897145	-0.39163	-0.610989	-2.58911	0.0107921	-1.07814	-0.143835	0.115914	0.306242	0.760536	-0.642026	0.873854	0.273183	0.862489	0.392992	-0.36476	0.911126
GAFT1	-0.483585	-2.75244	0.0063915	-0.829776	-0.137395	-0.591506	-1.91203	0.0582168	-1.20391	0.0209022	-0.843773	-1.50298	0.138365	-1.96796	0.280413	-1.46581	-2.77876	0.00793296	-2.52825	-0.403359
GAFT2	-0.396106	-2.07344	0.0392545	-0.772531	-0.0196806	-0.557974	-1.69523	0.0925826	-1.20955	0.0935984	0.448285	0.688364	0.494016	-0.855786	1.75236	-1.3487	-2.32316	0.0247487	-2.51798	-0.17942
SIPS_N			<0,001					<0,001					0.001					<0,001
GAFT0	-0.790448	-6.75558	<0,001	-1.02102	-0.559873	-0.661144	-3.81057	<0,001	-1.0047	-0.317592	-0.875059	-5.22094	<0,001	-1.21081	-0.539305	-1.03116	-6.37689	<0,001	-1.35684	-0.705473
GAFT1	-1.07342	-7.01657	<0,001	-1.37489	-0.771946	-1.18198	-5.64644	<0,001	-1.59648	-0.767481	-0.886129	-3.10715	0.00296508	-1.45743	-0.314824	-0.911911	-2.43162	0.0190757	-1.66724	-0.156577
GAFT2	-0.955897	-5.58955	<0,001	-1.2929	-0.618893	-1.09633	-4.78502	<0,001	-1.55001	-0.642657	-0.459249	-1.32393	0.190907	-1.15414	0.235644	-1.17686	-3.00423	0.0043392	-1.96585	-0.387865
SIPS_D			<0,001					<0,001					<0,001					0.007
GAFT0	-1.60929	-7.60455	<0,001	-2.02632	-1.19227	-1.42495	-4.77379	<0,001	-2.016	-0.833903	-1.63273	-5.11065	<0,001	-2.27272	-0.992745	-1.09894	-1.92329	0.060784	-2.24977	0.0518867
GAFT1	-1.83186	-6.37287	<0,001	-2.3983	-1.26541	-1.65479	-4.24977	<0,001	-2.4258	-0.88377	-2.23904	-4.4586	<0,001	-3.24503	-1.23304	-2.61784	-2.64823	0.0111178	-4.60882	-0.626852
GAFT2	-1.68547	-5.29669	<0,001	-2.31255	-1.0584	-1.98418	-4.90468	<0,001	-2.78522	-1.18313	-0.682831	-1.03367	0.305732	-2.00615	0.640484	-2.48702	-2.29899	0.0262027	-4.66585	-0.308182
SIPS_G			<0,001					0.014					0.473					0.005
GAFT0	-0.770821	-3.76481	<0,001	-1.17429	-0.367351	-0.726917	-2.56894	0.011437	-1.28721	-0.16662	-0.641521	-1.61883	0.111103	-1.43538	0.152338	-1.04691	-3.32228	0.00177952	-1.6816	-0.412231
GAFT1	-0.996531	-3.69393	<0,001	-1.52815	-0.464909	-1.02289	-2.83459	0.00539257	-1.73743	-0.308351	-0.689664	-1.13868	0.259684	-1.90296	0.523637	-1.12322	-1.85344	0.0703819	-2.34381	0.0973632
GAFT2	-0.487556	-1.63362	0.103743	-1.07569	0.100574	-0.409899	-1.04047	0.300233	-1.18997	0.370176	0.344543	0.494057	0.623198	-1.05247	1.74155	-1.66202	-2.64013	0.0113497	-2.92994	-0.394099
Childhood adverse and trauma experiences (TADS)	ALL (n=195)					FEP† (n=107)					CHR-P‡ (n=48)					CHR-N§ (n=40)
TADSsum			0.093					0.34					0.868					0.022
GAFT0	0.0462459	0.674303	0.50093	-0.0890274	0.181519	0.0755556	0.682254	0.496595	-0.144054	0.295165	0.0237918	0.206339	0.837437	-0.208304	0.255888	-0.0738579	-0.876477	0.386278	-0.244447	0.0967313
GAFT1	-0.200108	-2.1635	0.0317382	-0.382541	-0.0176757	-0.127897	-0.883613	0.378943	-0.414928	0.159134	-0.156099	-0.896397	0.374708	-0.506624	0.194427	-0.406284	-2.63519	0.012104	-0.718398	-0.09417
GAFT2	-0.21506	-2.16141	0.0319012	-0.411313	-0.0188072	-0.276343	-1.81823	0.0719067	-0.577733	0.0250475	0.0663831	0.334388	0.739607	-0.33322	0.465986	-0.365832	-2.16297	0.0369011	-0.708227	-0.0234373
EmoAb			0.146					0.413					0.959					0.031
GAFT0	0.135721	0.653596	0.514154	-0.273851	0.545293	0.142439	0.437401	0.662727	-0.503332	0.788209	0.131937	0.397876	0.692562	-0.535546	0.79942	-0.144777	-0.516345	0.608605	-0.712393	0.422839
GAFT1	-0.474944	-1.68817	0.093002	-1.02985	0.0799629	-0.185607	-0.435424	0.664157	-1.03091	0.659698	-0.396355	-0.788908	0.434213	-1.40765	0.614943	-1.26257	-2.45128	0.018946	-2.30526	-0.219873
GAFT2	-0.62653	-2.07799	0.0390406	-1.22122	-0.0318362	-0.784924	-1.75682	0.0818909	-1.67092	0.101069	0.205658	0.359836	0.720616	-0.944778	1.35609	-1.24513	-2.23521	0.0313584	-2.37283	-0.117437
PhyAb			0.018					0.769					0.039					0.01
GAFT0	0.0912905	0.266103	0.790446	-0.58537	0.767951	0.709402	1.07873	0.283204	-0.594698	2.0135	-0.380517	-0.665614	0.508982	-1.53124	0.770211	-0.363135	-1.06332	0.294348	-1.05449	0.328218
GAFT1	-1.25035	-2.72397	0.00704537	-2.15572	-0.344987	-0.268697	-0.310554	0.756762	-1.98446	1.44707	-1.9518	-2.36303	0.0224091	-3.6144	-0.289204	-1.77724	-2.87189	0.00663857	-3.03002	-0.524463
GAFT2	-1.43425	-2.91236	0.00401215	-2.4056	-0.462902	-1.04456	-1.14272	0.255777	-2.85723	0.768124	-1.65548	-1.72596	0.0910668	-3.58618	0.275219	-1.70922	-2.53184	0.0156024	-3.07588	-0.34257
SexAb			0.405					0.722					0.85					0.053
GAFT0	0.0936167	0.304431	0.761129	-0.512922	0.700155	0.436423	0.972064	0.333274	-0.453892	1.32674	0.205305	0.23012	0.819019	-1.59053	2.00113	-0.392831	-1.13571	0.263192	-1.09305	0.30739
GAFT1	-0.323428	-0.772459	0.440793	-1.14927	0.502412	0.498925	0.848053	0.398356	-0.667731	1.66558	-2.26031	-1.71524	0.0930303	-4.91287	0.392239	-1.3359	-2.02993	0.0494078	-2.66816	-0.0036418
GAFT2	-0.590474	-1.31482	0.190137	-1.47626	0.295309	-0.43702	-0.698292	0.486553	-1.67809	0.804047	1.47348	0.967696	0.338257	-1.59149	4.53844	-1.25668	-1.76482	0.0856303	-2.6982	0.184834
EmoNeg			0.253					0.162					0.799					0.296
GAFT0	0.0854476	0.454896	0.649698	-0.285047	0.455942	-0.00207169	-0.00750112	0.994029	-0.549755	0.545611	0.0987784	0.344177	0.732281	-0.47892	0.676477	-0.210532	-0.632934	0.530567	-0.883905	0.46284
GAFT1	-0.428144	-1.68323	0.0939559	-0.929841	0.0735522	-0.593658	-1.66384	0.0991557	-1.30121	0.113891	-0.0777401	-0.177723	0.859721	-0.958225	0.802744	-0.716619	-1.10525	0.276	-2.02919	0.595951
GAFT2	-0.344229	-1.25397	0.211377	-0.885674	0.197216	-0.597876	-1.5748	0.118339	-1.35074	0.154986	0.230336	0.466295	0.643205	-0.763975	1.22465	-0.634281	-0.910519	0.368289	-2.0445	0.775943
PhyNeg			0.589					0.495					0.46					0.251
GAFT0	0.224513	0.300196	0.74789	0.455442	-0.367592	0.254097	0.517643	0.605807	-0.719322	1.22751	0.0653586	0.138067	0.89079	-0.887514	1.01823	-0.0432939	-0.110942	0.912246	-0.833289	0.746701
GAFT1	-0.478357	0.408411	-1.17126	0.242944	-1.2839	-0.649973	-1.01526	0.312337	-1.91952	0.619572	0.348625	0.484787	0.630128	-1.09891	1.79616	-1.23814	-1.66824	0.103489	-2.74062	0.264333
GAFT2	-0.266393	0.440488	-0.604769	0.546047	-1.13521	-0.644661	-0.947034	0.345817	-1.99455	0.705224	0.785408	0.97258	0.335849	-0.840108	2.41092	-0.717079	-0.88129	0.383701	-2.36427	0.930109
Premorbid adjustment (PAS)	ALL (n=228)					FEP† (n=124)					CHR-P‡ (n=57)					CHR-N§ (n=47)
PAS Childhood			<0,001					0.005					<0,001					0.364
GAFT0	-0.409554	-1.64486	0.101395	-0.900205	0.0810965	-0.198943	-0.53907	0.590829	-0.929571	0.531686	-1.57497	-4.52652	<0,001	-2.27226	-0.877676	-0.101953	-0.269621	0.788684	-0.863551	0.659645
GAFT1	-1.28988	-4.06648	6.60202e-05	-1.91494	-0.66482	-1.27191	-2.7676	0.0065352	-2.18175	-0.362067	-1.93904	-3.49193	0.000953668	-3.05187	-0.826209	-0.696429	-1.0416	0.30316	-2.04308	0.650226
GAFT2	-1.35586	-3.9628	9.94831e-05	-2.03009	-0.681639	-1.64455	-3.44907	0.000774823	-2.58852	-0.700579	-1.50356	-2.23078	0.0297935	-2.8543	-0.15282	-0.581265	-0.804088	0.425574	-2.03723	0.874704
PAS Early adolescence			<0,001					<0,001					0.008					0.49
GAFT0	-0.515109	-2.91527	0.00391304	-0.863295	-0.166923	-0.463147	-1.83042	0.0696487	-0.964084	0.0377891	-0.889102	-3.56671	0.000757707	-1.38867	-0.389538	-0.150014	-0.458883	0.648527	-0.808445	0.508418
GAFT1	-1.04975	-4.6539	5.56222e-06	-1.49423	-0.605262	-1.25285	-4.05923	8.76863e-05	-1.86389	-0.641811	-0.944983	-2.38321	0.0206431	-1.73962	-0.150346	-0.353959	-0.606633	0.547143	-1.52915	0.821232
GAFT2	-1.12539	-4.63145	6.14205e-06	-1.60421	-0.646564	-1.5399	-4.85161	3.68771e-06	-2.16827	-0.911521	-0.595702	-1.26529	0.211102	-1.53921	0.347808	-0.406993	-0.648623	0.519879	-1.67079	0.856803
PAS Late adolescence			<0,001					<0,001					0.004					0.201
GAFT0	-0.579445	-3.57289	0.000431842	-0.899027	-0.259862	-0.549687	-2.33701	0.0210822	-1.01535	-0.0840272	-0.498105	-2.23851	0.0292549	-0.944039	-0.0521719	-0.699008	-2.06429	0.0447831	-1.38102	-0.0169945
GAFT1	-1.20725	-5.9355	1.0988e-08	-1.60805	-0.806448	-1.49086	-5.38165	<0,001	-2.03931	-0.942413	-0.973668	-3.00133	0.00403594	-1.6238	-0.323532	-0.253436	-0.400803	0.690462	-1.52699	1.02012
GAFT2	-1.34522	-6.17649	3.0334e-09	-1.7744	-0.916038	-1.76036	-6.21827	<0,001	-2.32082	-1.1999	-0.707642	-1.8153	0.0749315	-1.48886	0.0735771	-0.857425	-1.28067	0.20687	-2.20589	0.491038
†First-episode psychosis; ‡Confirmed clinical high-risk to psychosis; §Nonconfirmed clinical high risk to psychosis.
GAFT0 =functioning at baseline, GAFT1=functioning at 9 months, GAFT2=functioning at 18 months.
* Number of total sample. ¤ Number for each variable shown separately.
